# Supplementary figures and images for: ZebraShare: a new venue for rapid dissemination of zebrafish mutant data
Source: PeerJ journal article supplement (doi:10.7717/peerj.11007), 2021-04-13

Samples: 25233  
Bases: 612  
Average spacing: 42

Page: 1 / 5  
8/31/2020

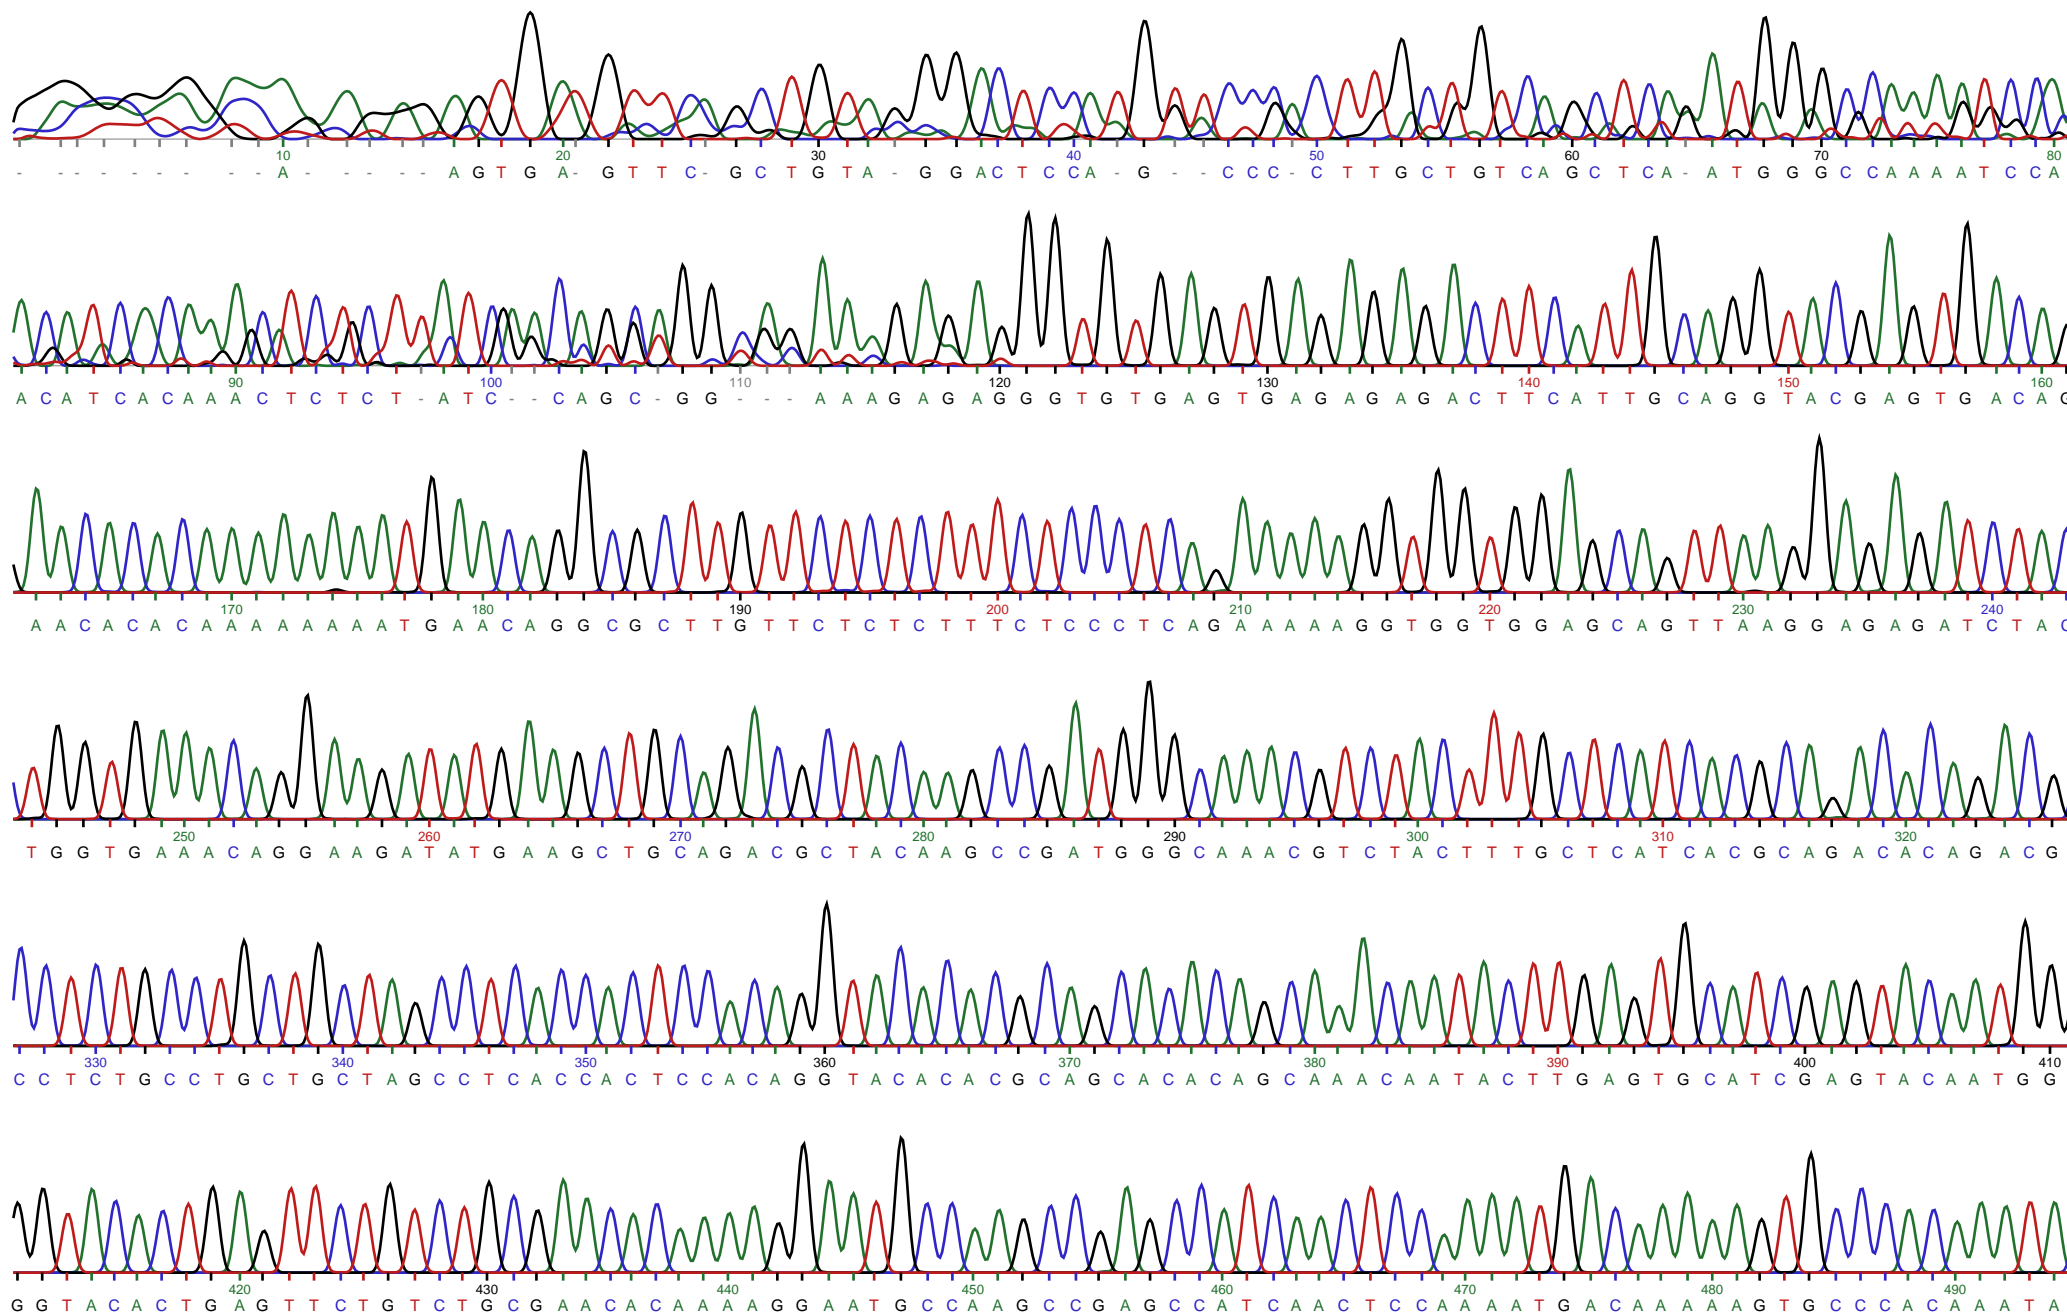

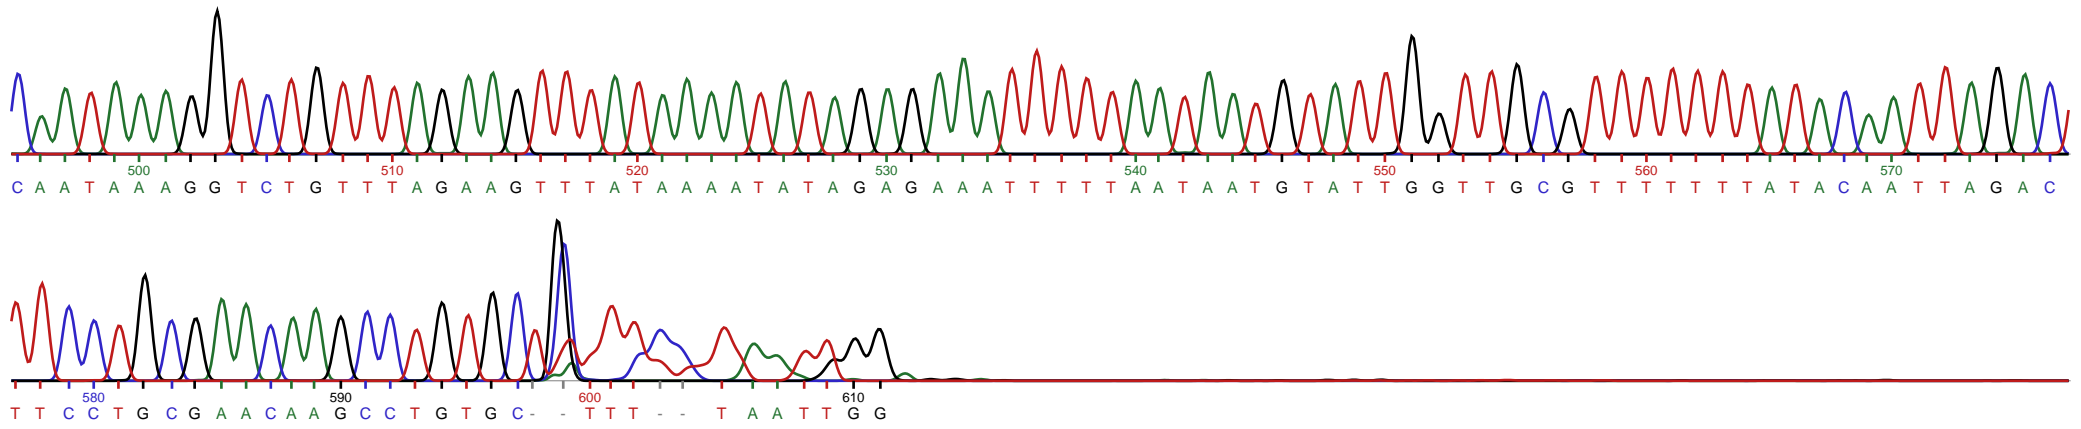

Samples: 25233  
Bases: 612  
Average spacing: 42

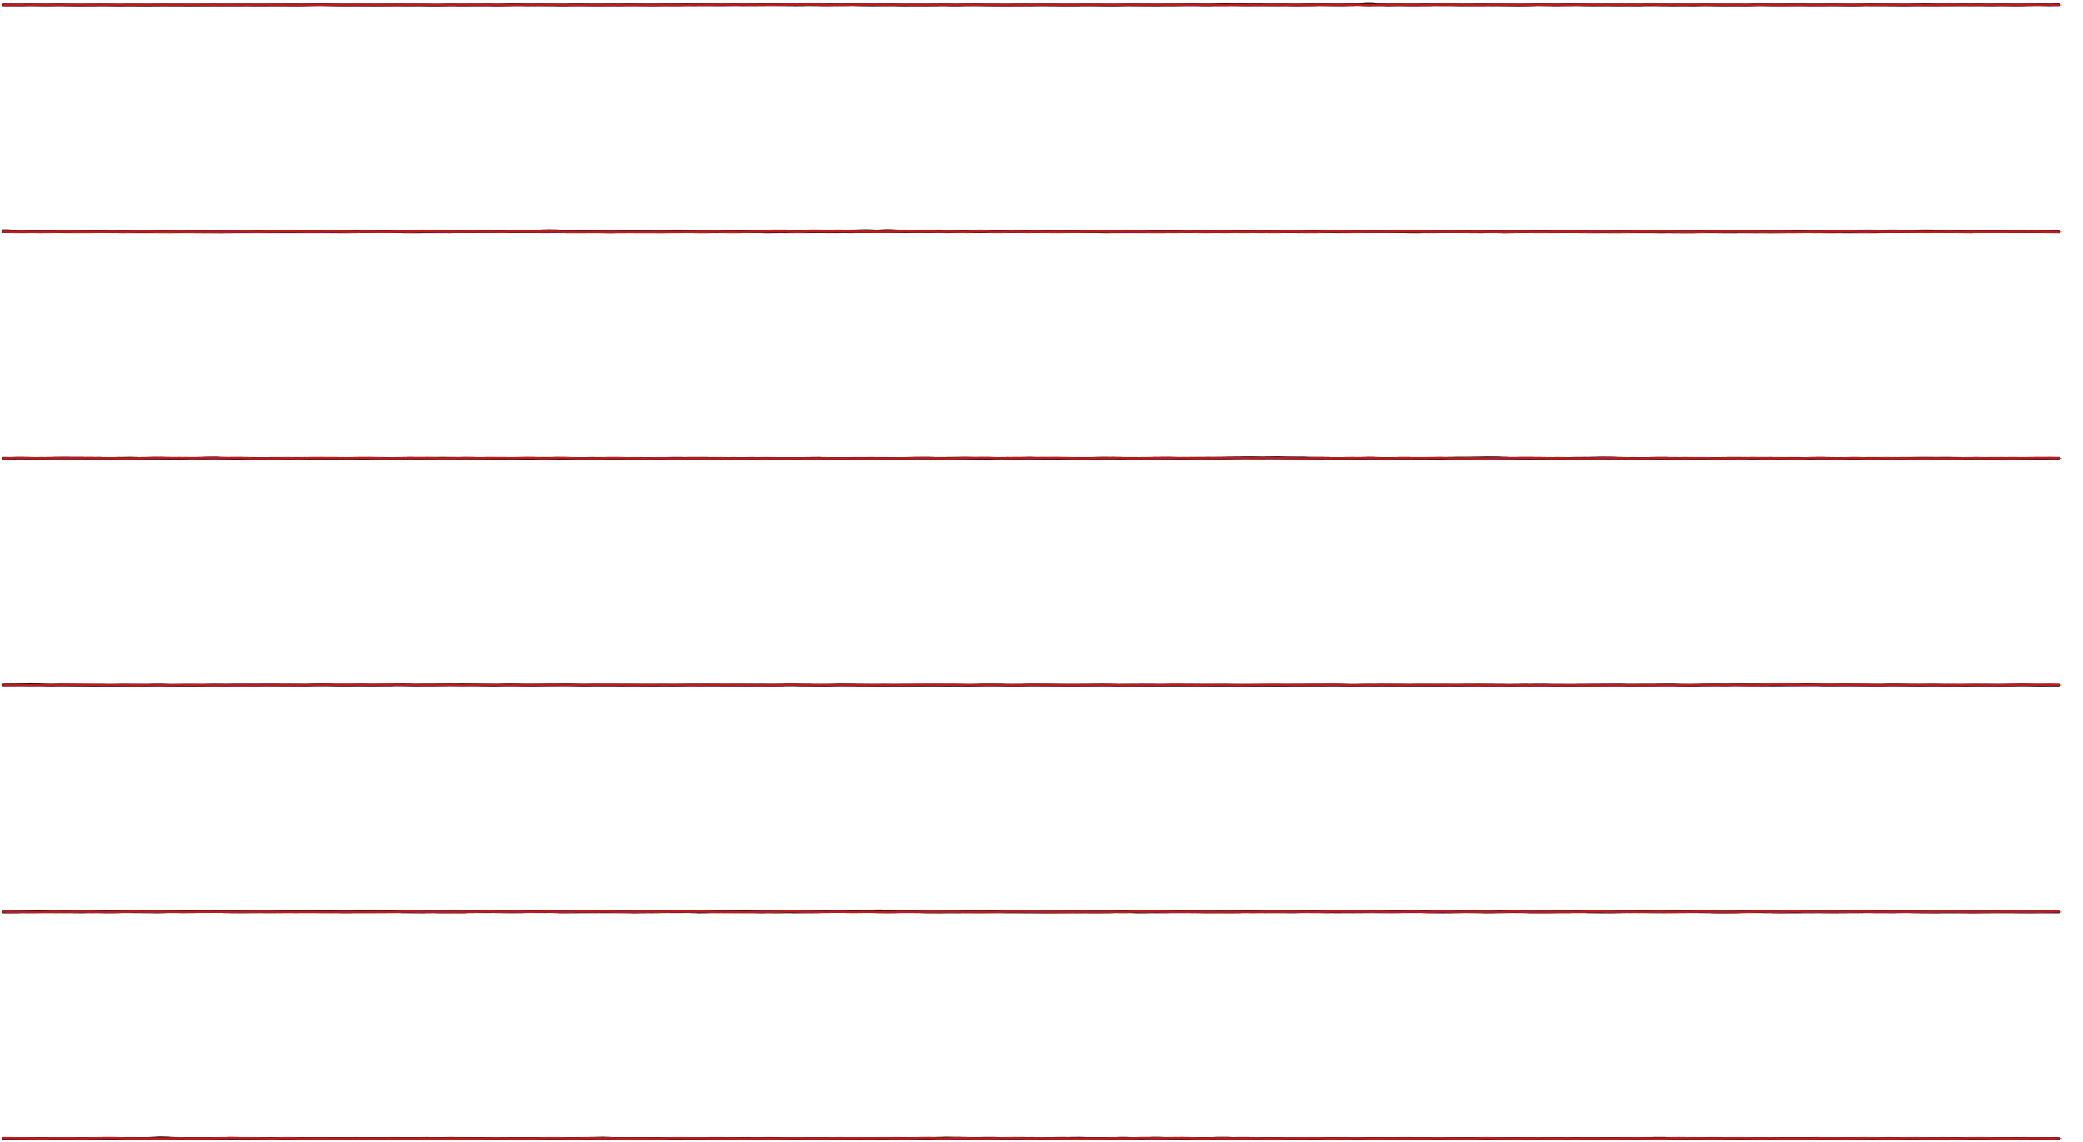

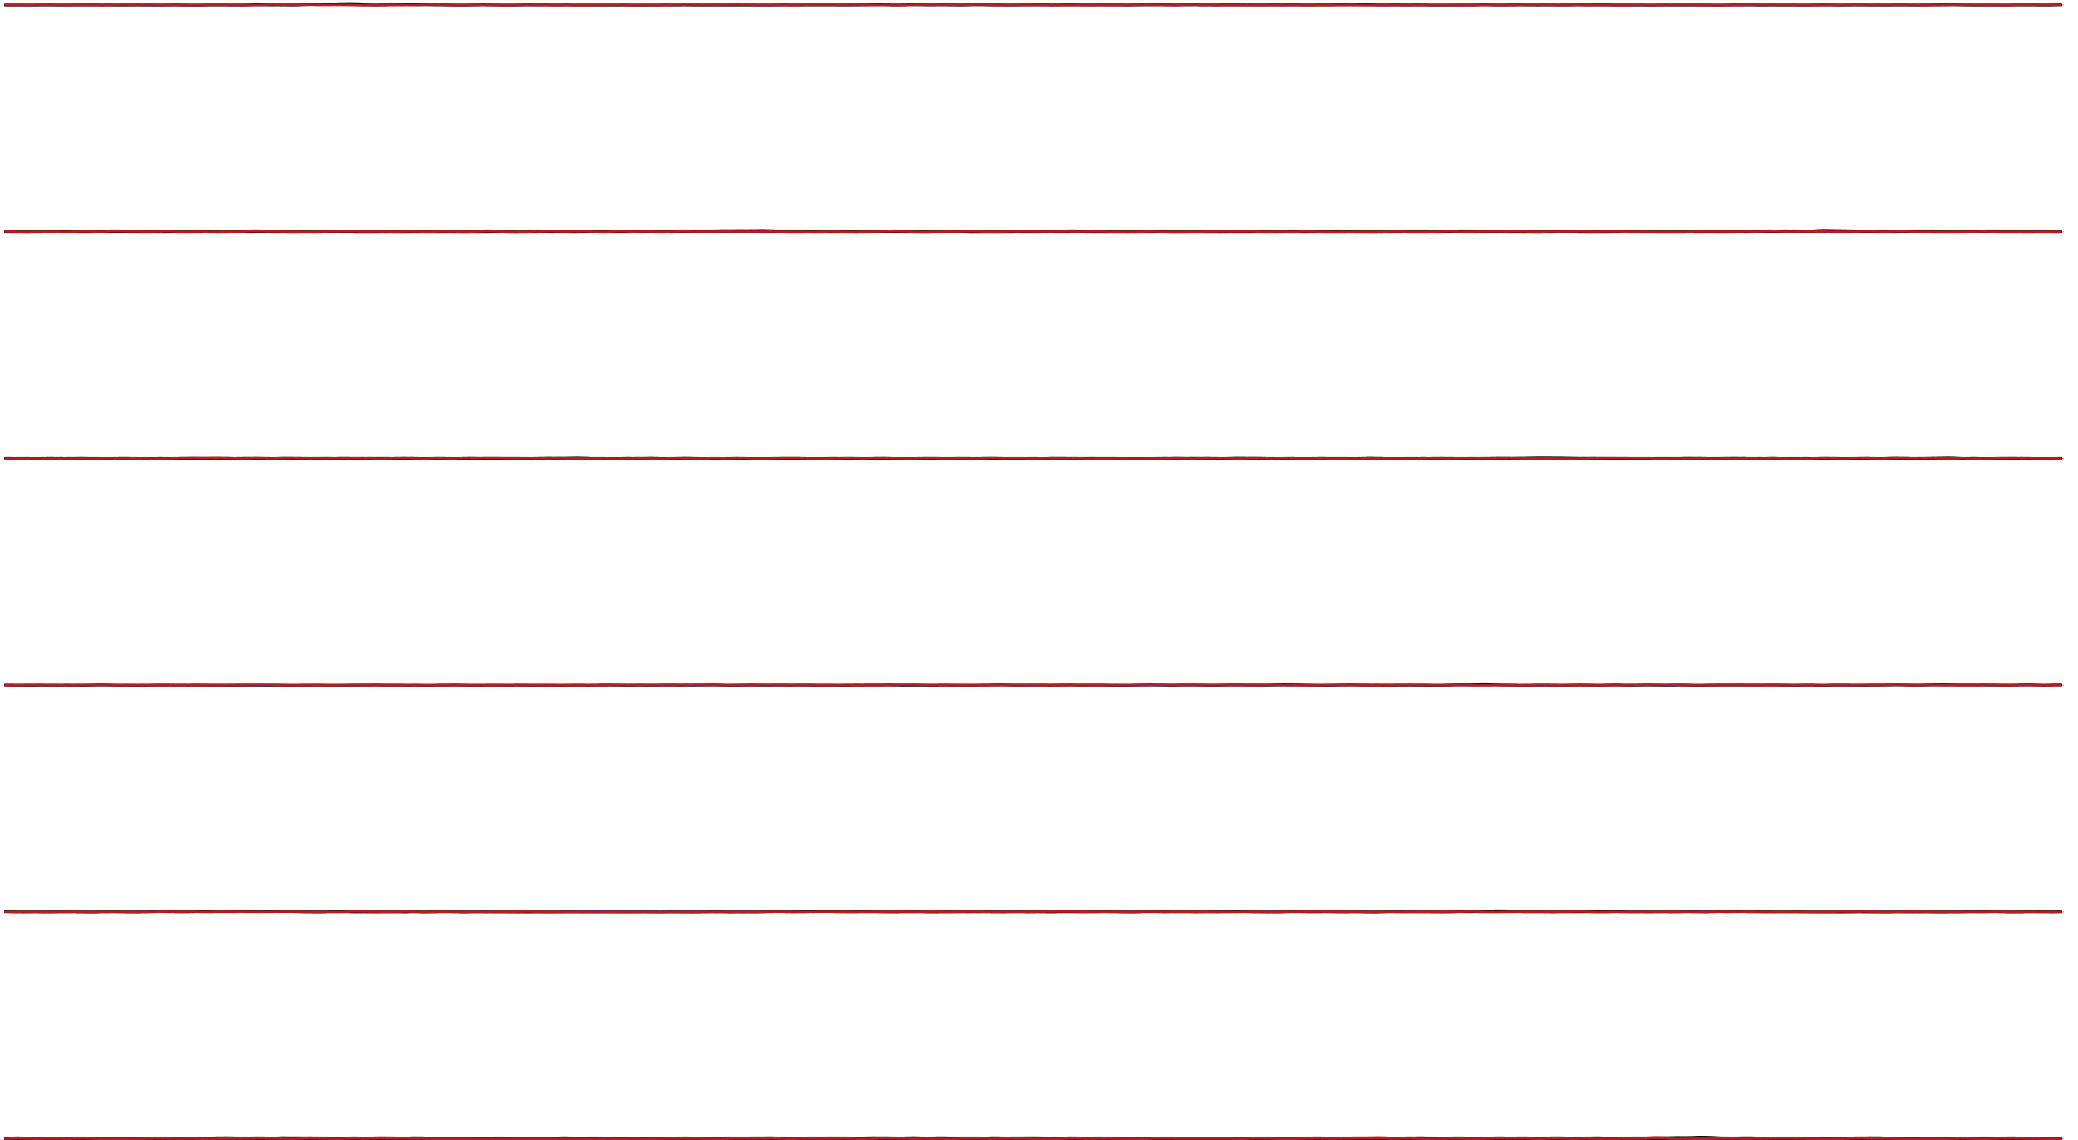

---

---

Supplement: phf21aa_Sequencing.zip [file phf21aa_Sequencing.zip]

Page: 1 / 4  
8/31/2020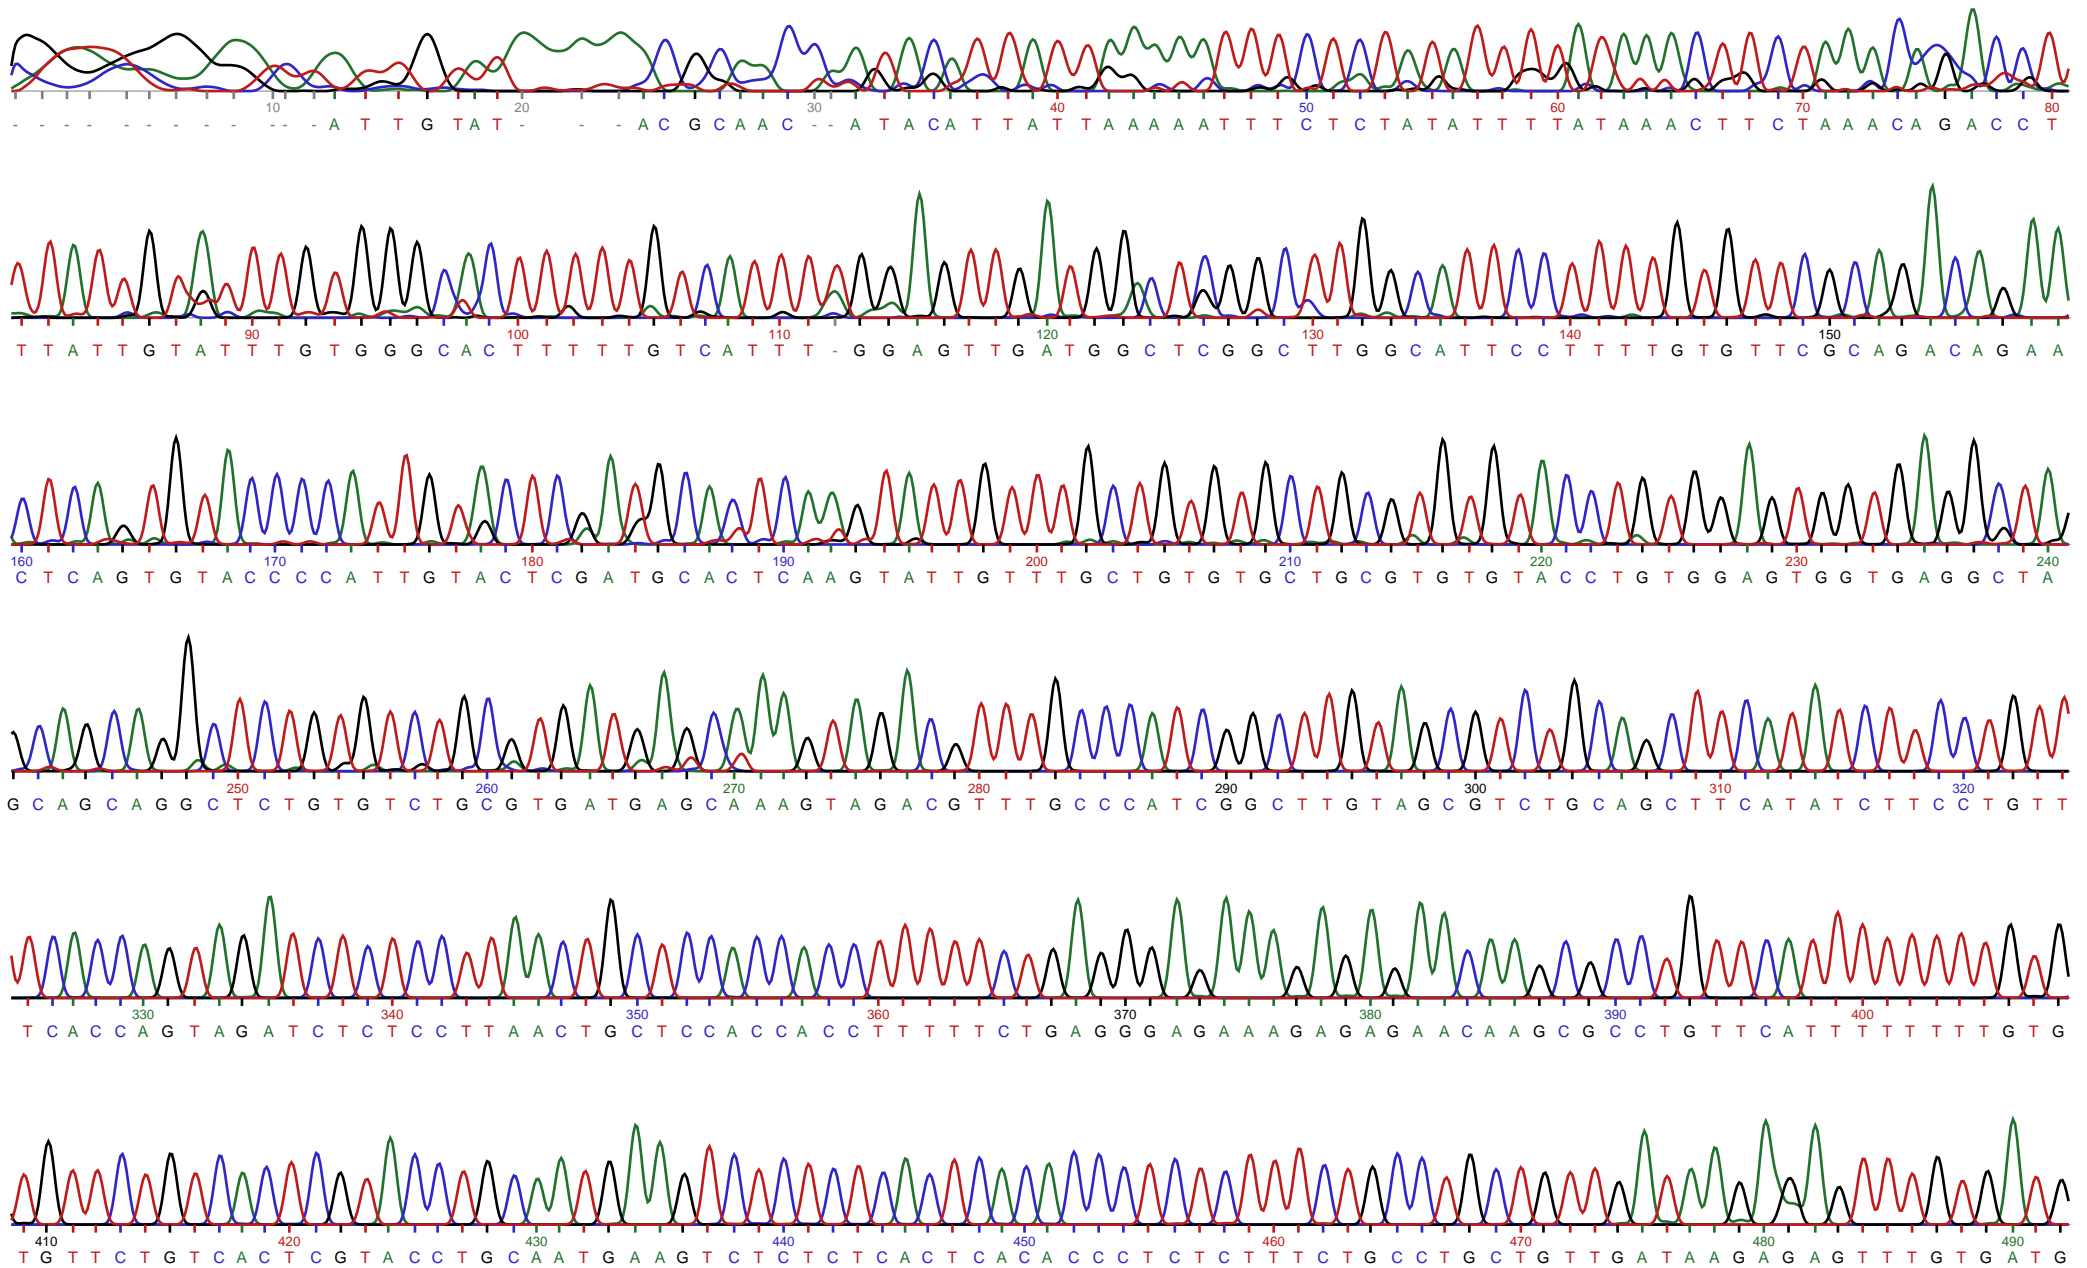

Samples: 22672  
Bases: 614  
Average spacing: 37

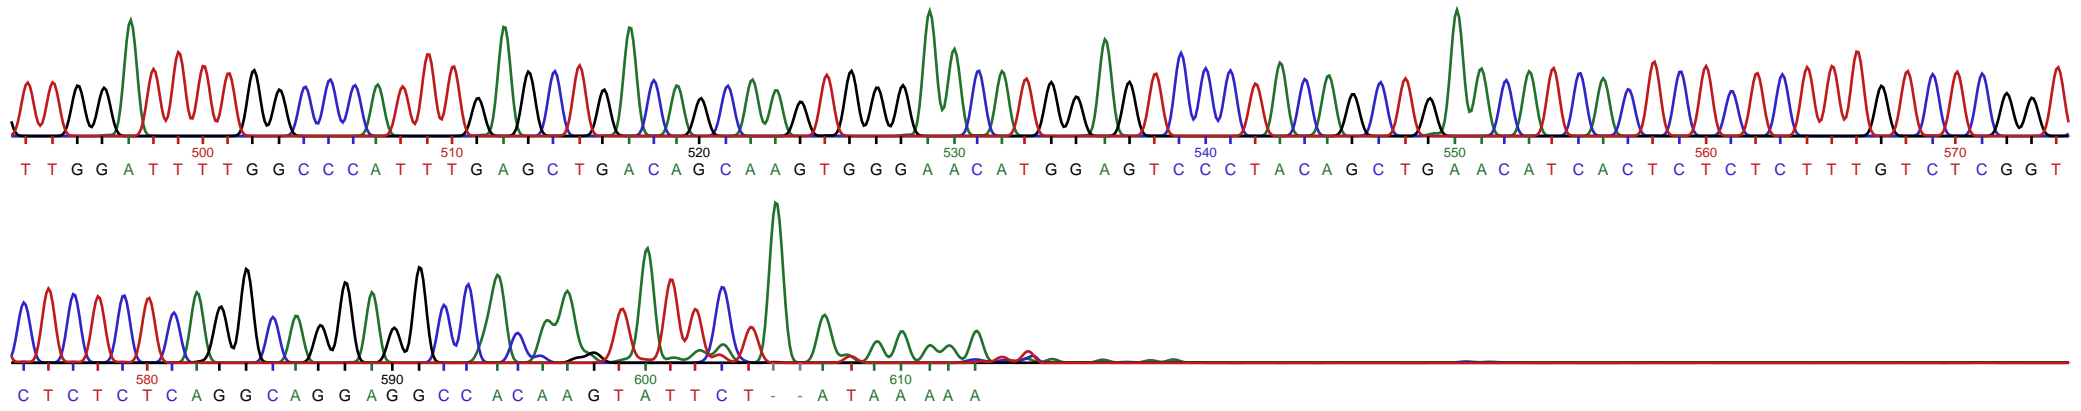

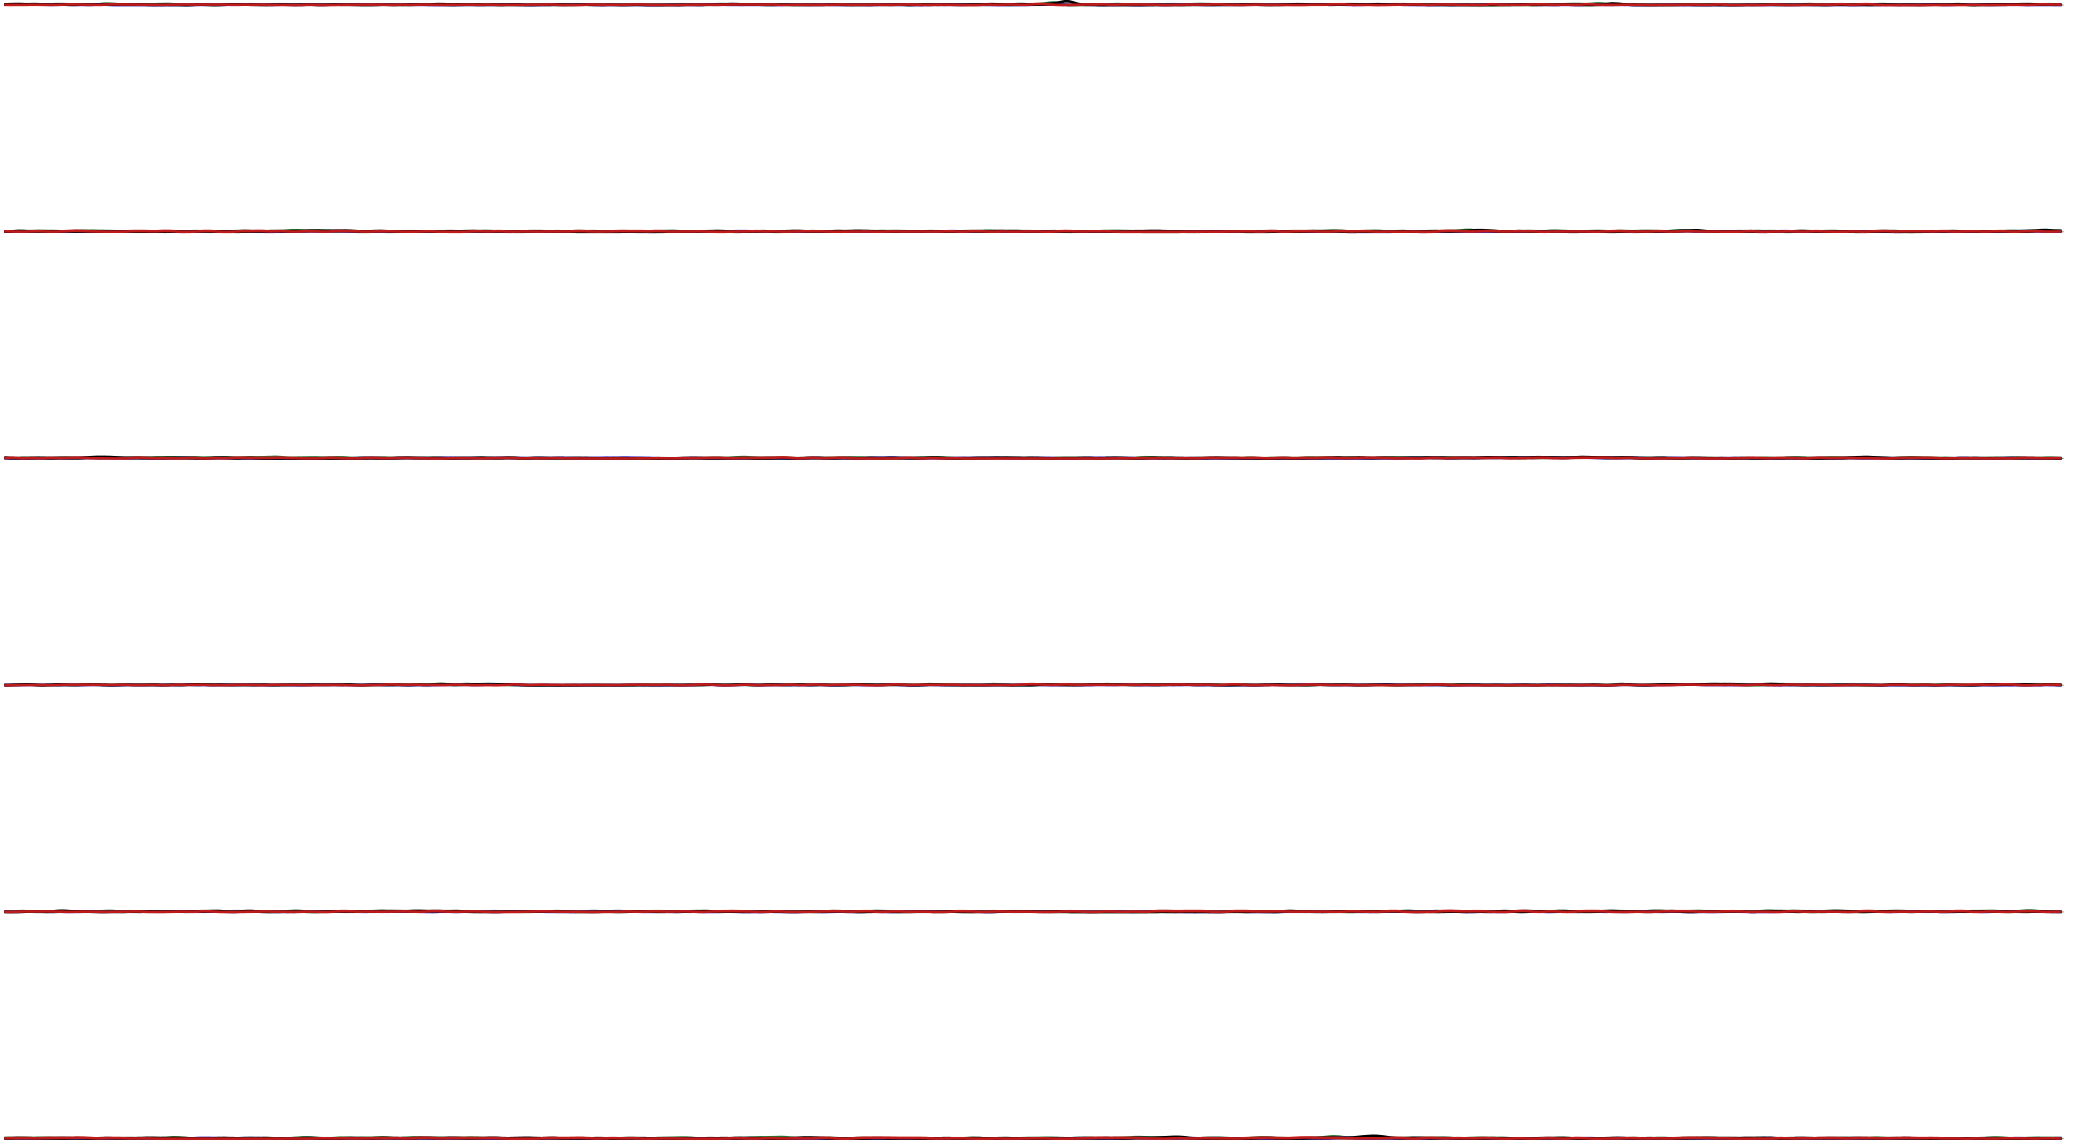

Samples: 22672  
Bases: 614  
Average spacing: 37

Page: 4 / 4  
8/31/2020

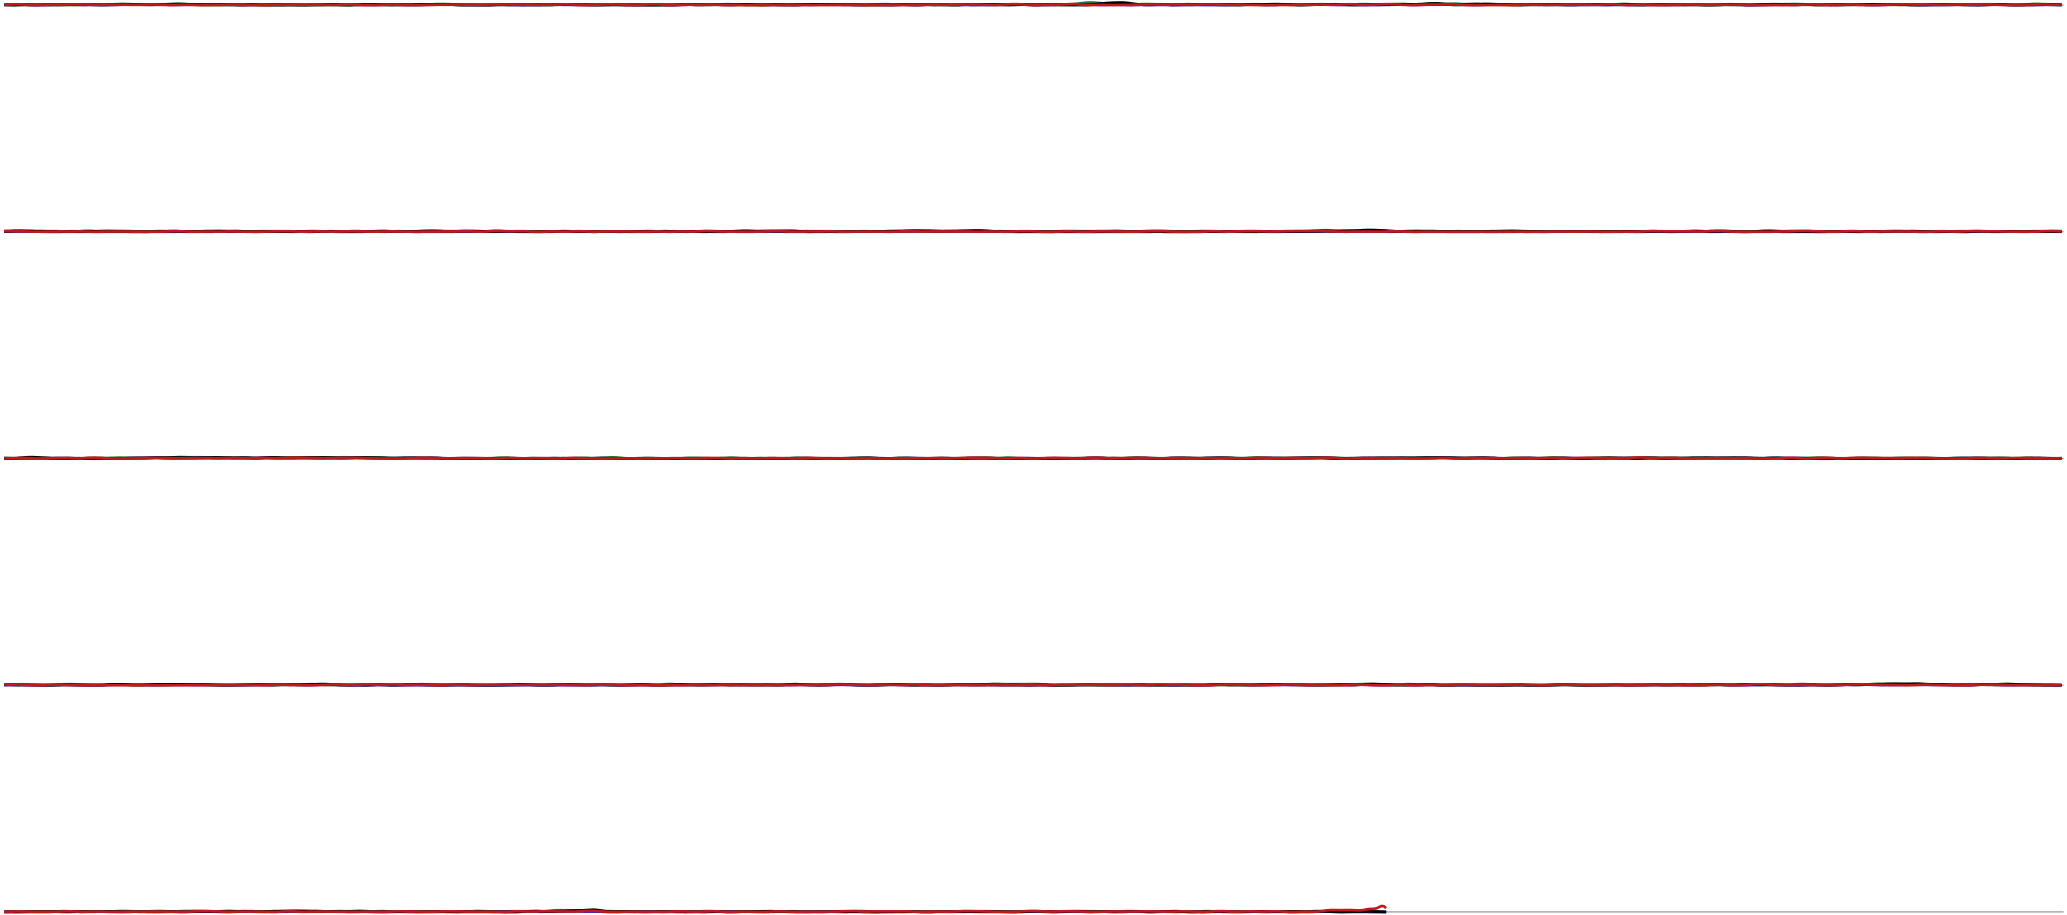

Supplement: phf21aa_Sequencing.zip [file phf21aa_Sequencing.zip]

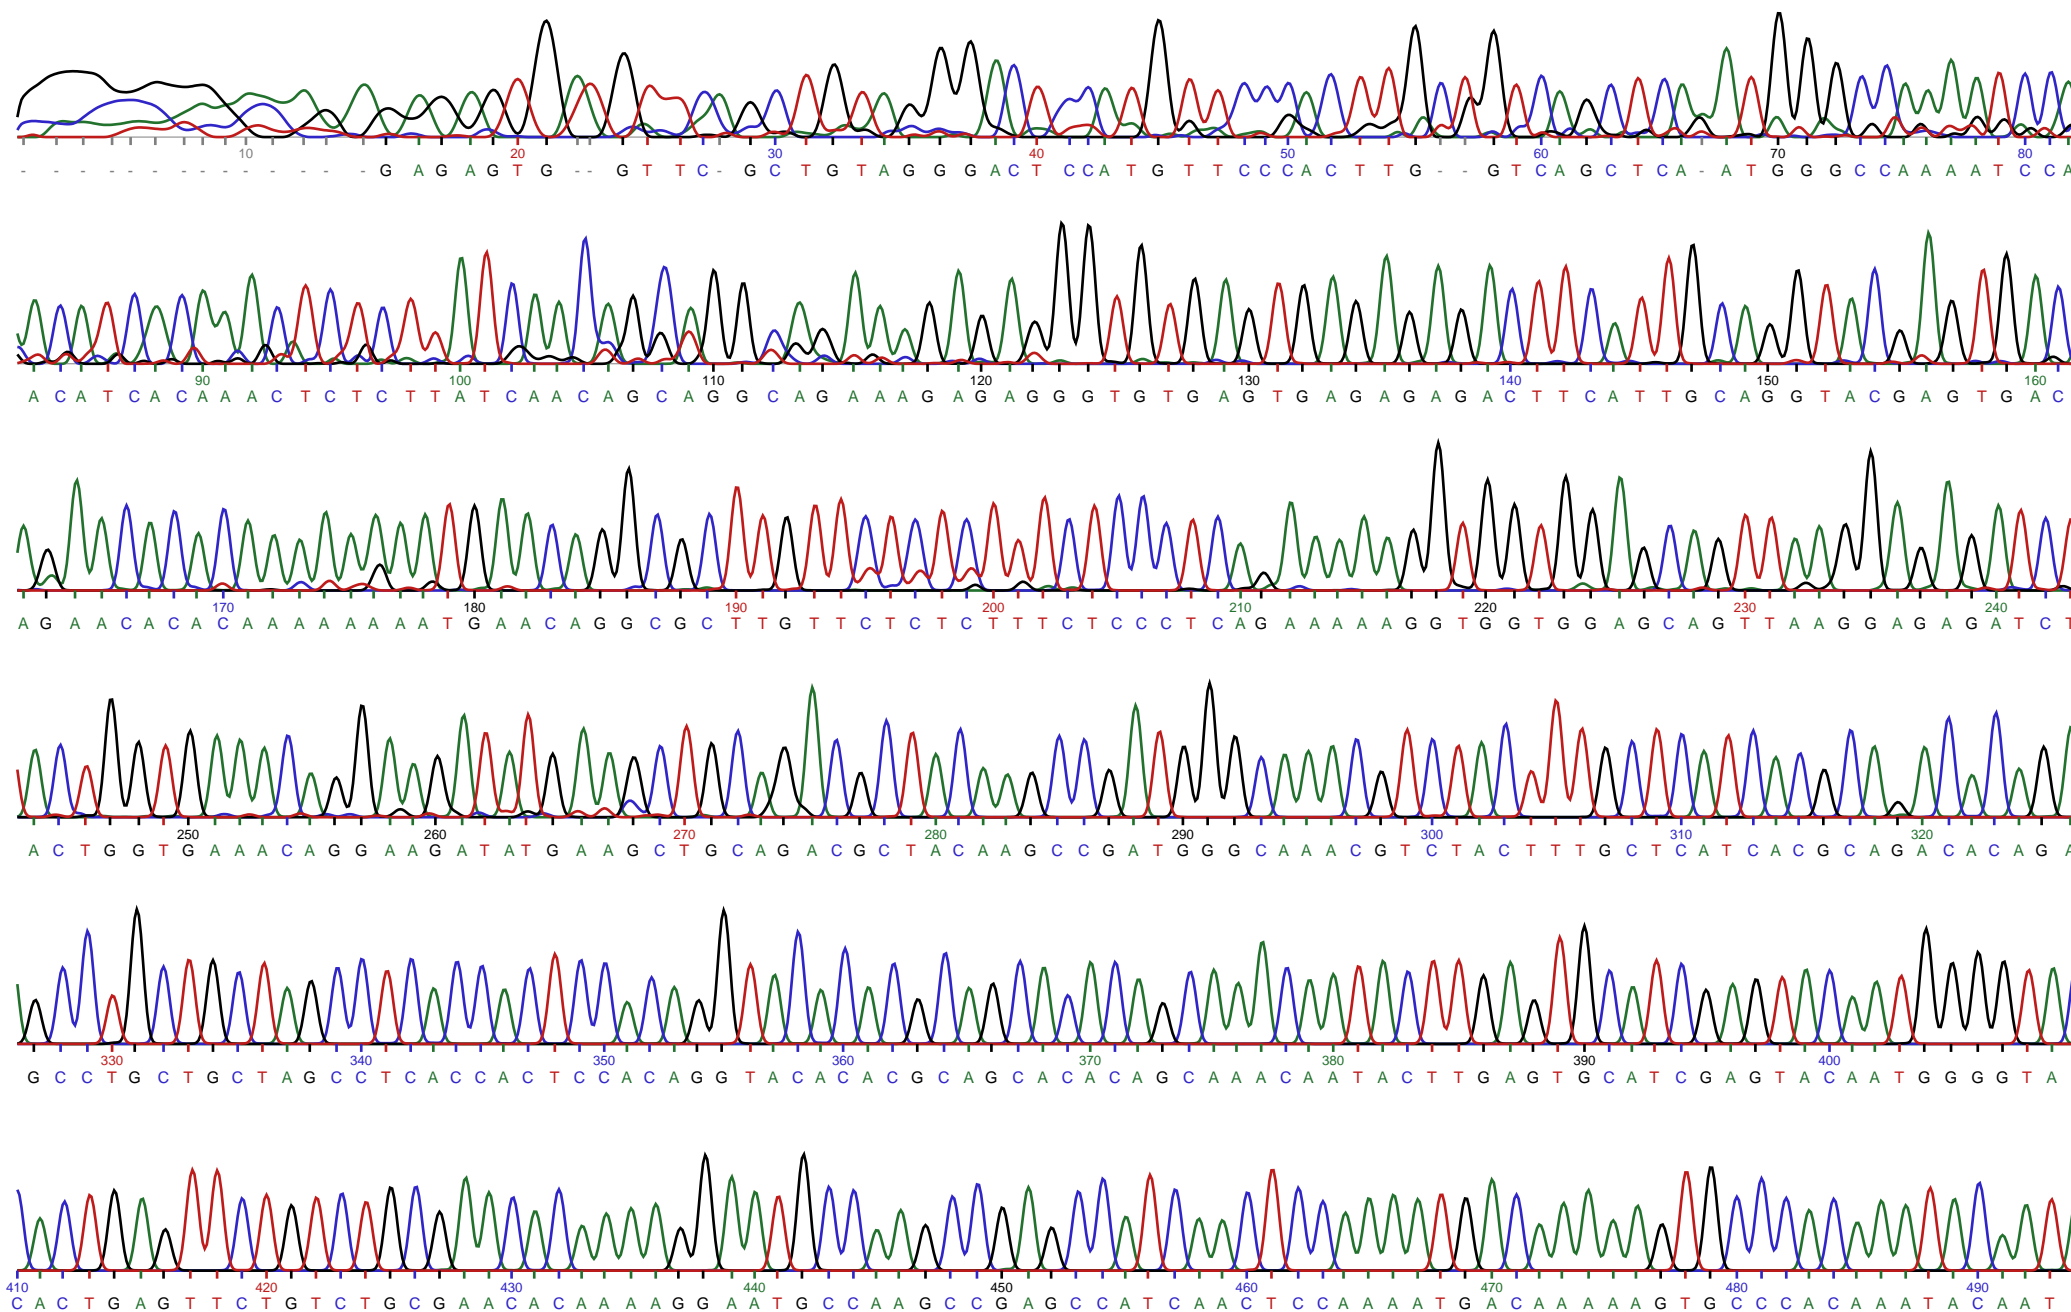

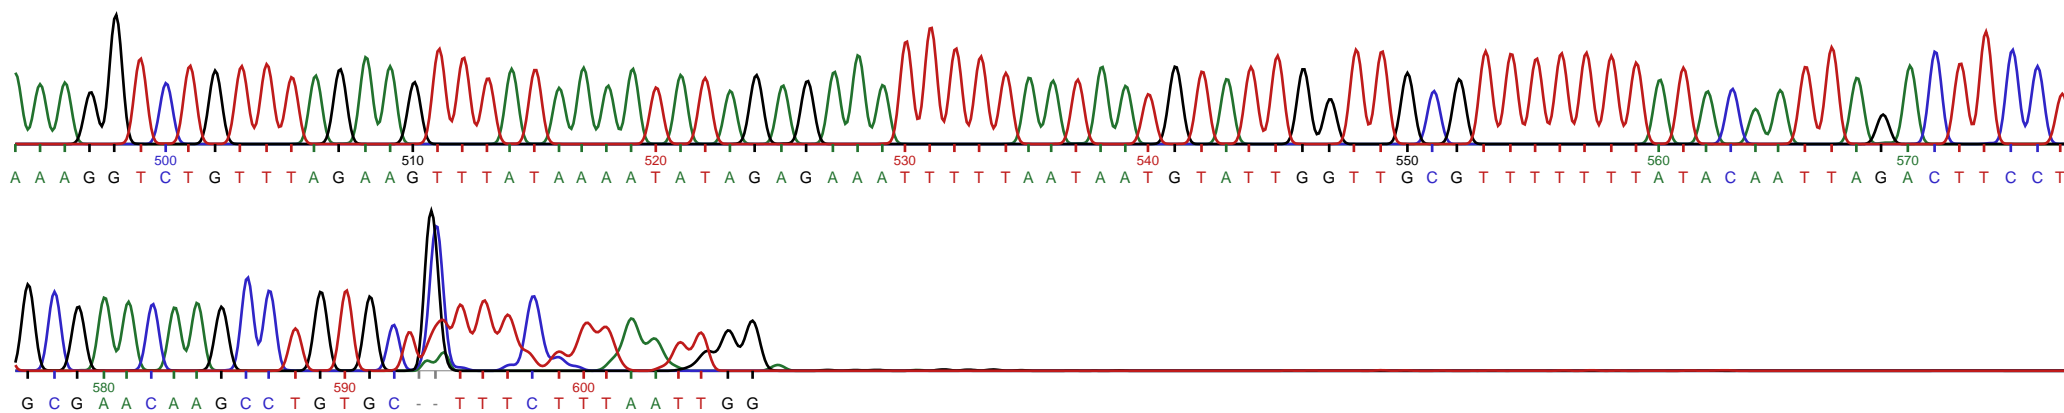

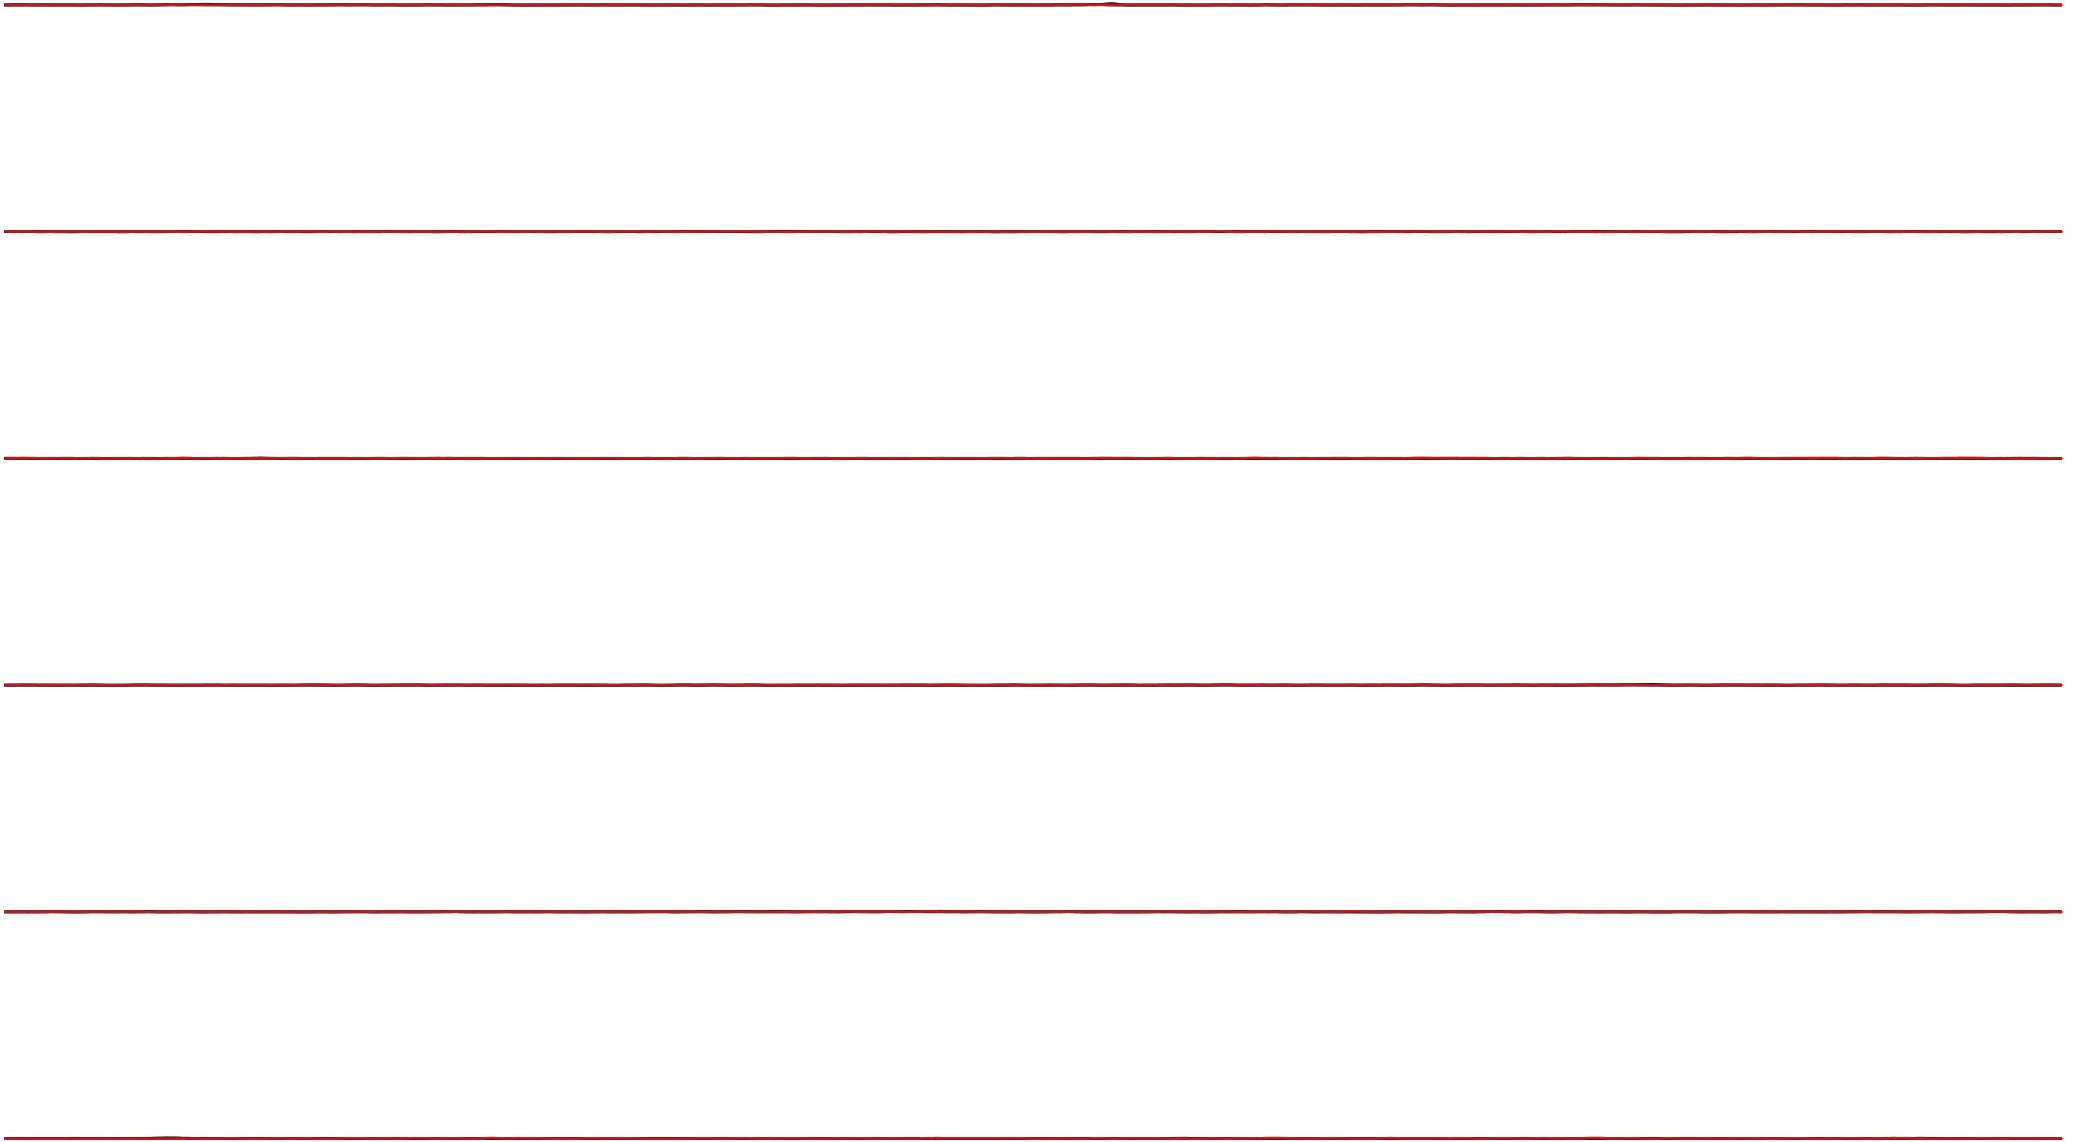

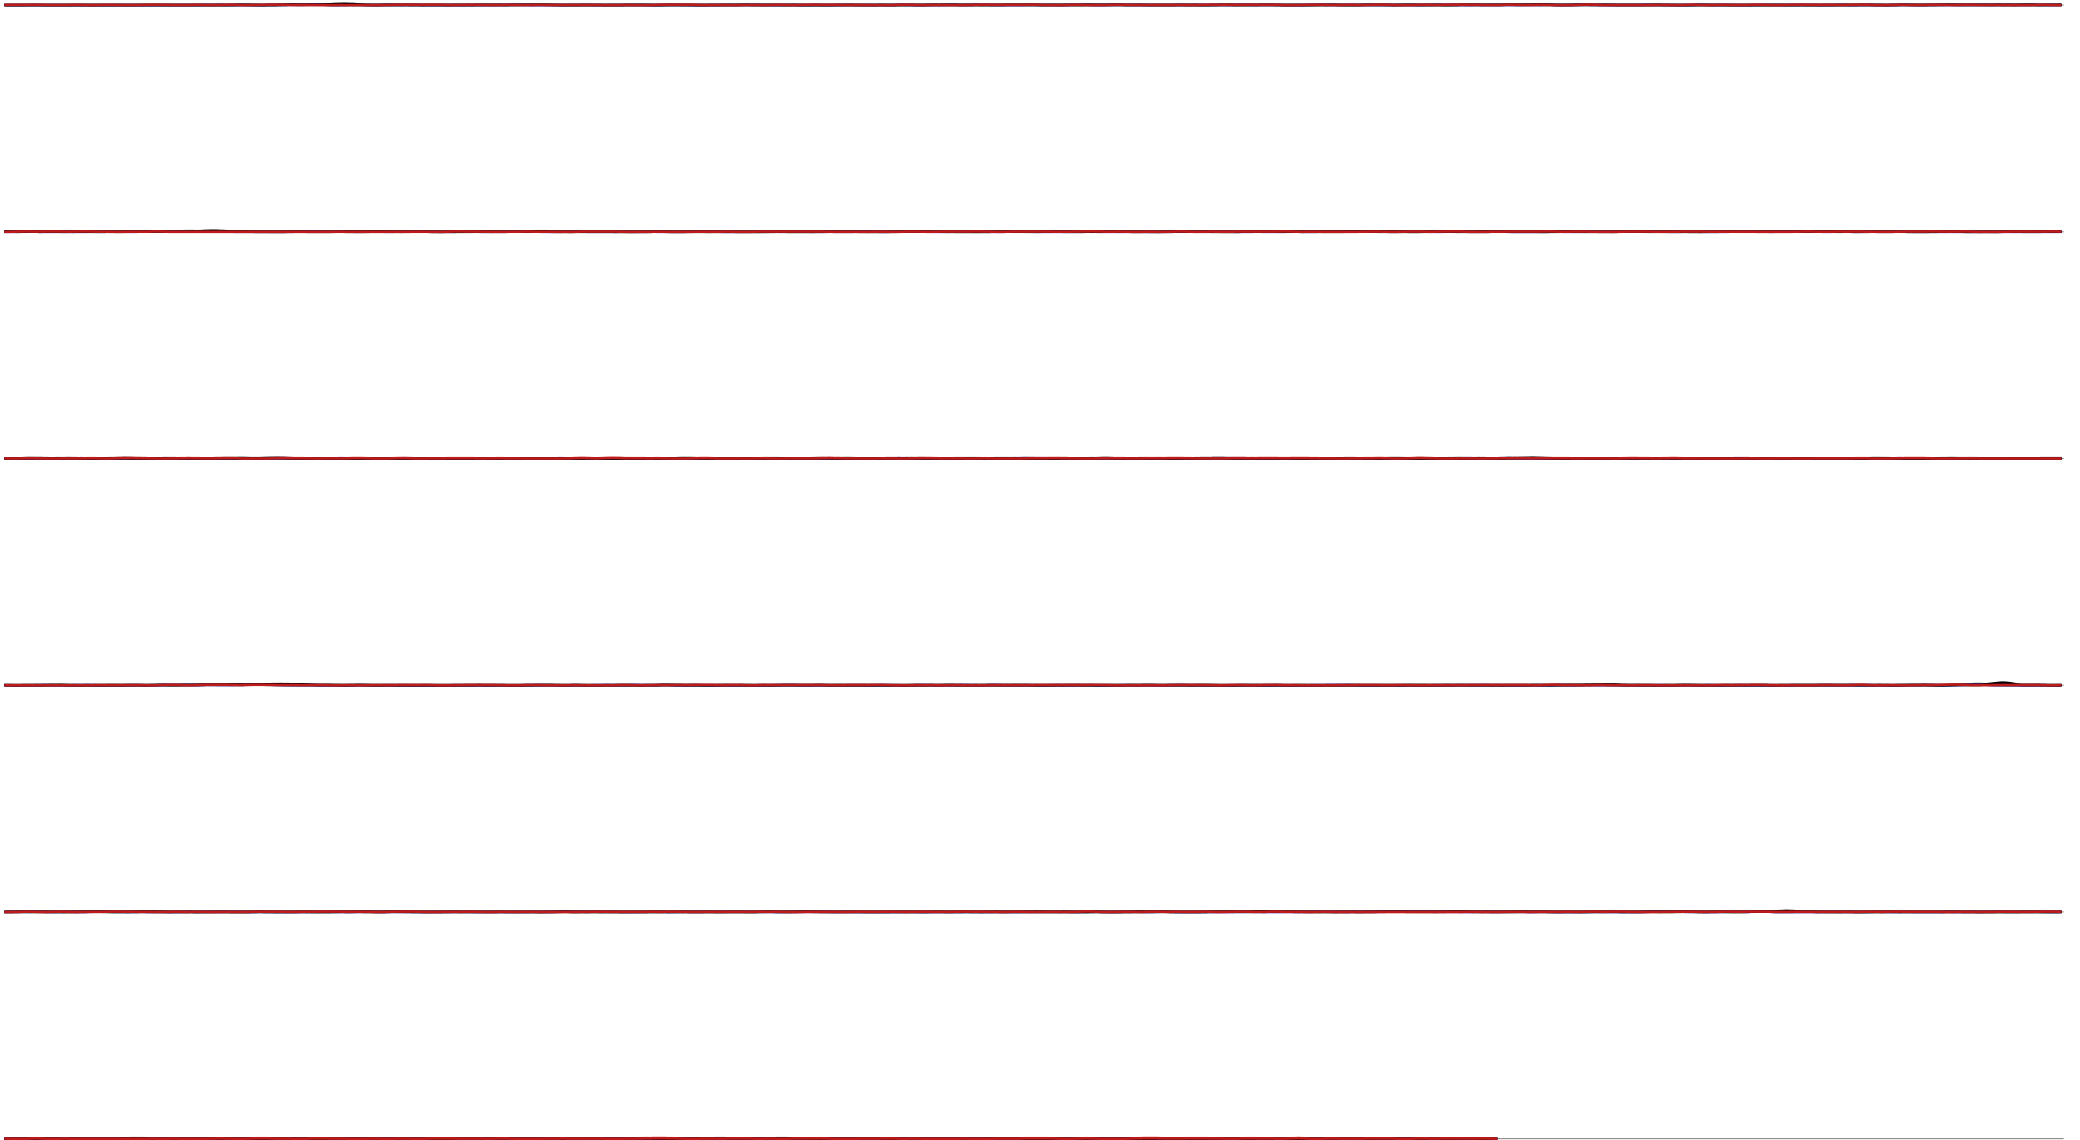

Supplement: phf21aa_Sequencing.zip [file phf21aa_Sequencing.zip]

Page: 1 / 4  
8/31/2020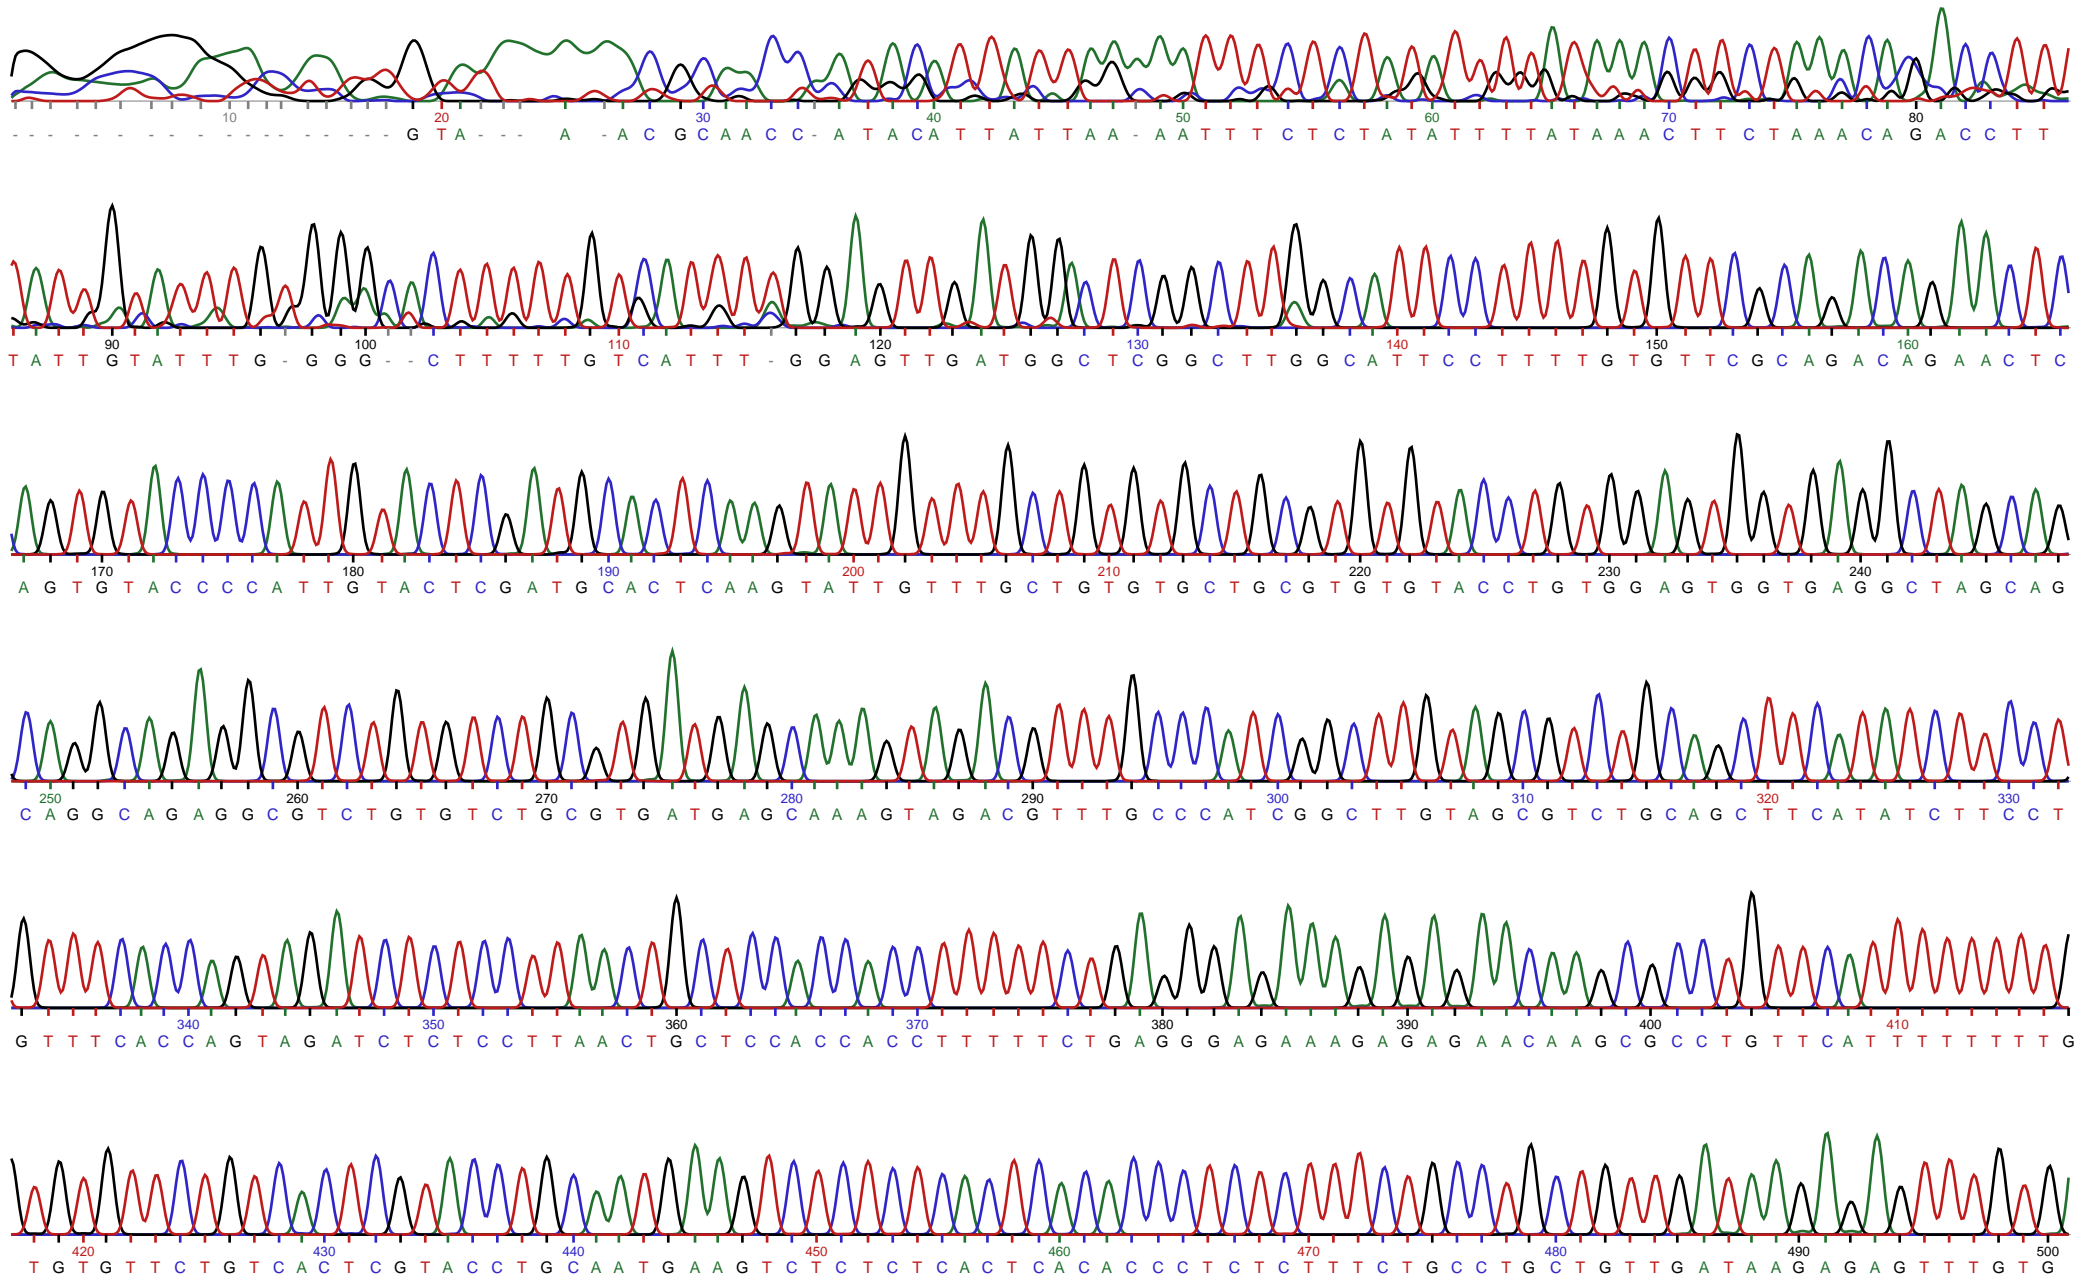

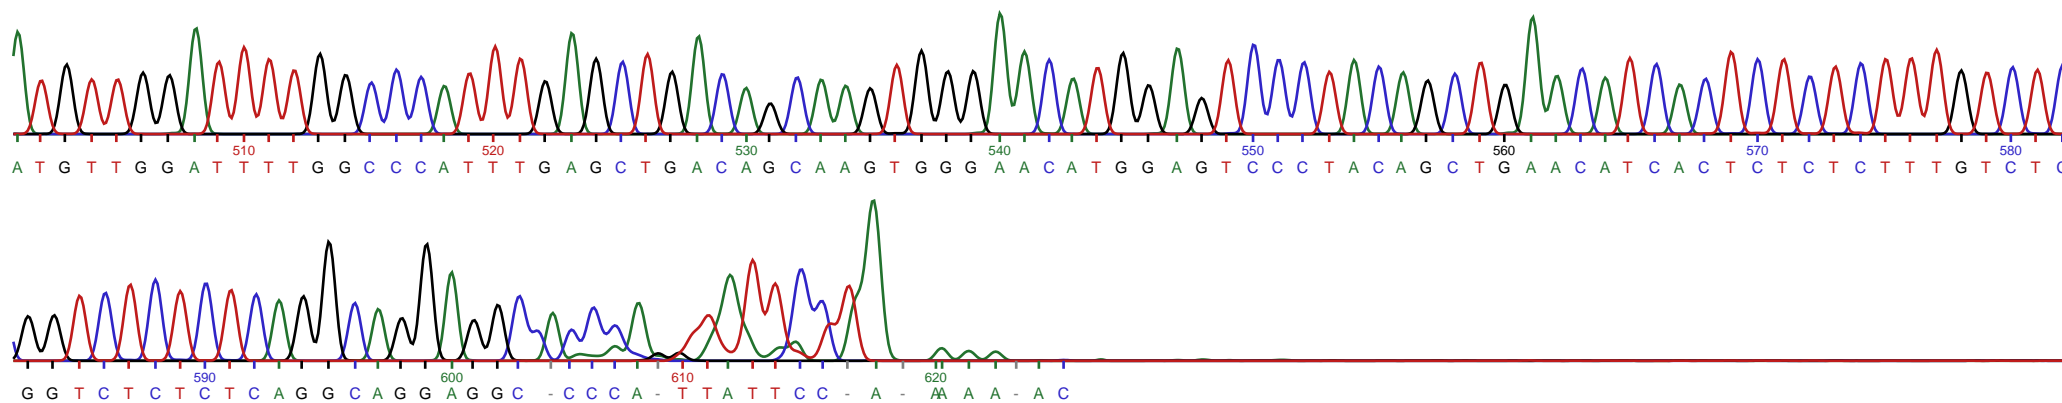

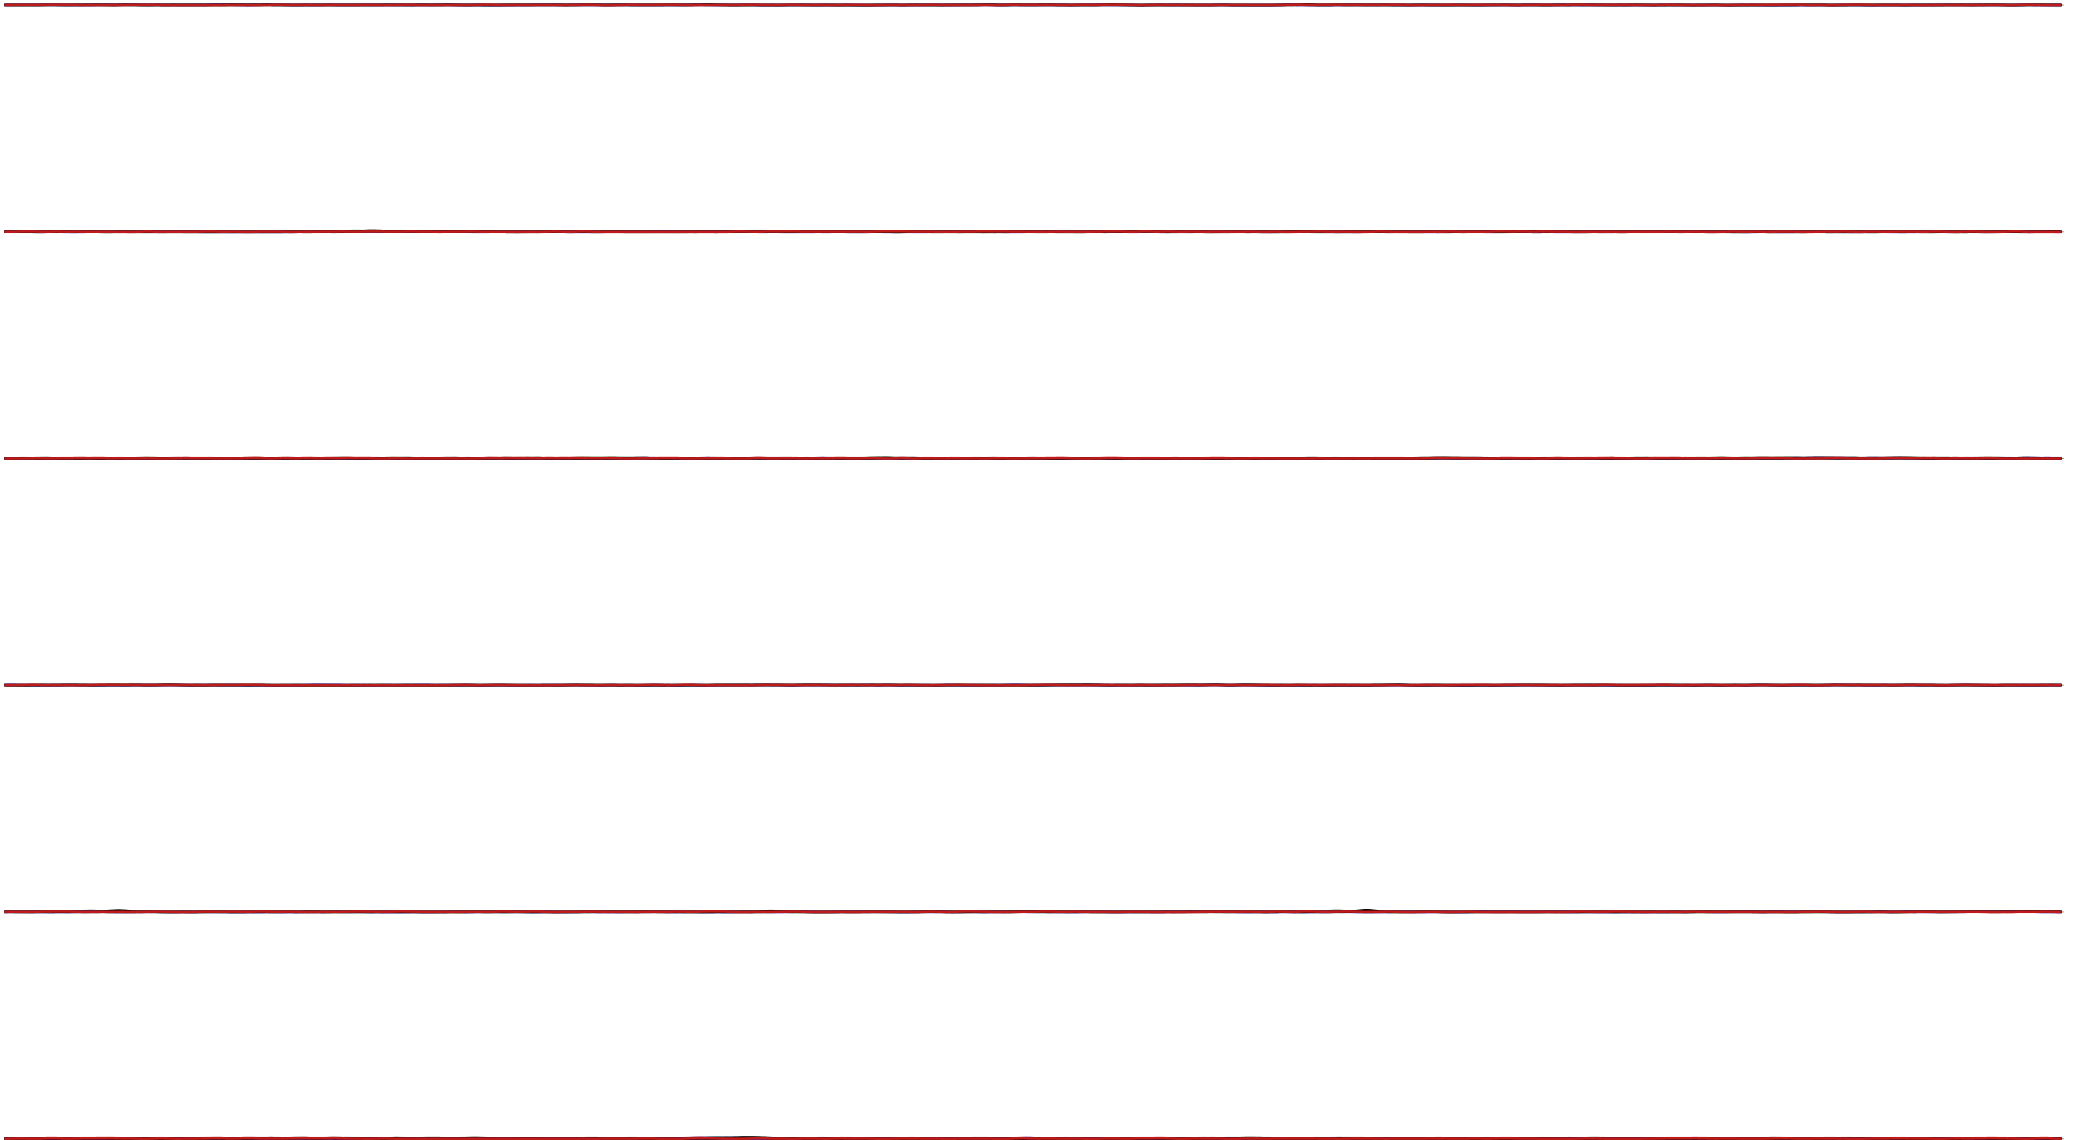

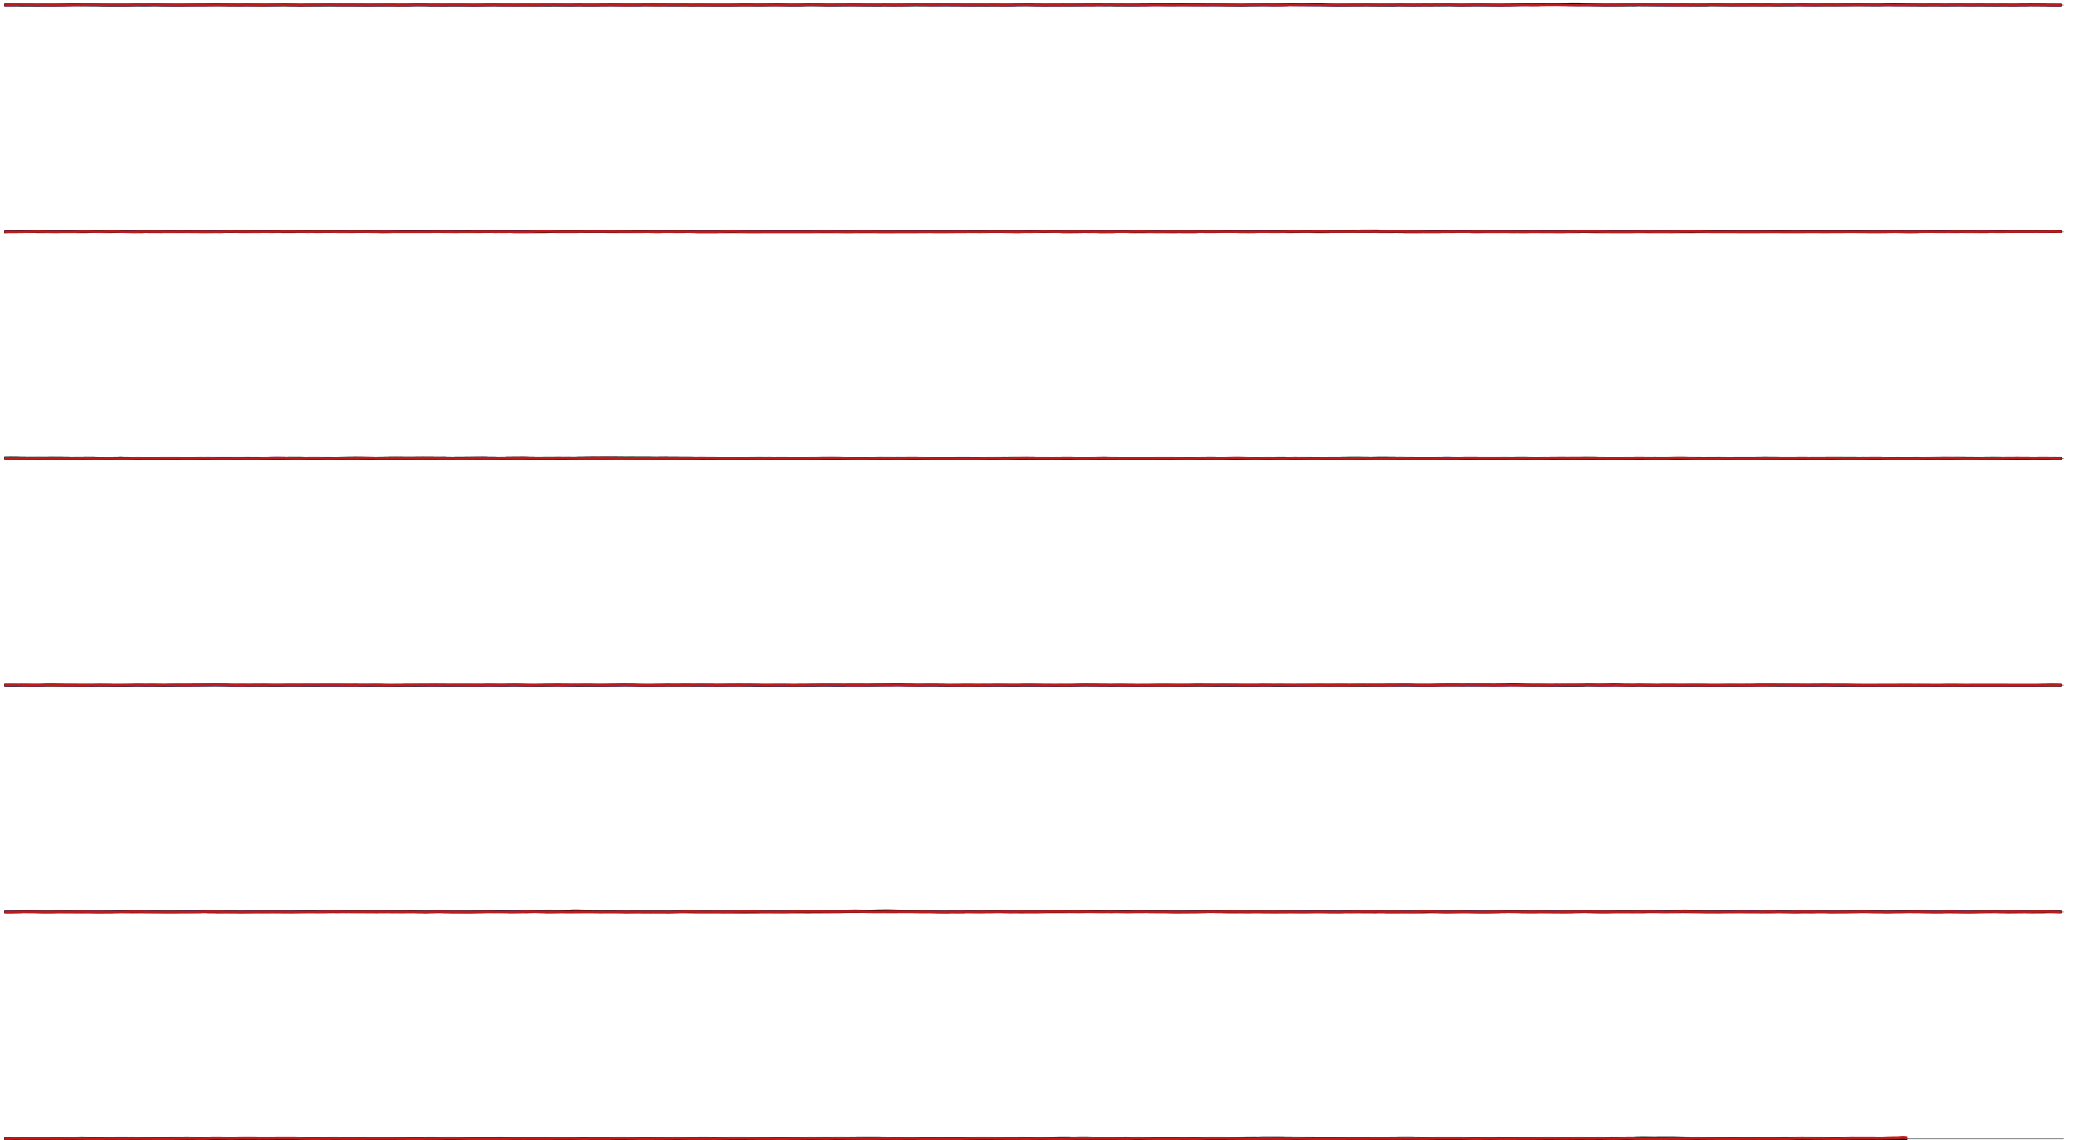

Supplement: phf21aa_Sequencing.zip [file phf21aa_Sequencing.zip]
